# Supplementary material for: Construction, alignment and analysis of twelve framework physical maps that represent the ten genome types of the genus Oryza
Source: Springer Nature journal article supplement (doi:10.1186/gb-2008-9-2-r45), 2008-02-27
Supplement: Additional file 10 [file gb-2008-9-2-r45-s10.doc]

**Additional data file 10.** Strategy of repeat analysis and classification using the OMAP BES resources.
